# Supplementary material
Source: publisher figshare collection journal article supplement (https://rs.figshare.com/ndownloader/files/12461318)
Supplement: Supplementary file 50 [file 12461318]

FORGEEFORGERS
