# Supplementary material
Source: publisher figshare collection journal article supplement (https://rs.figshare.com/ndownloader/files/12461318)

$$\{C, \chi_e, \chi_m, \mu\} = \{1, 20, 1, 0.1 \text{ MPa}\}$$

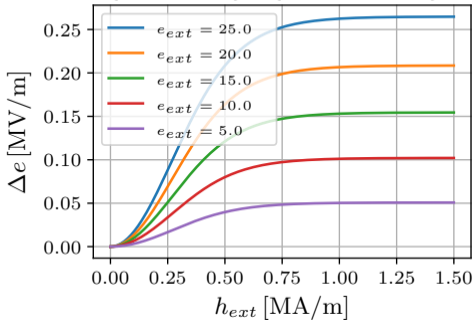

Supplement: Supplementary file 1 [file 12461318]

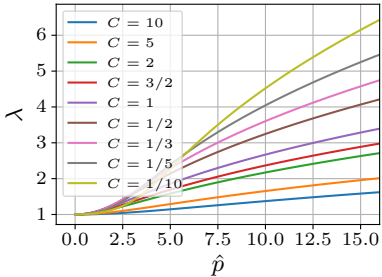

Supplement: Supplementary file 2 [file 12461318]

$$h_{ext} = 0.30 \text{ MA/m}$$

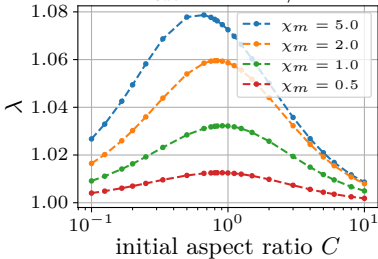

Supplement: Supplementary file 3 [file 12461318]

$$\{C, \chi_e, \chi_m, \mu\} = \{3, 10, 1, 0.1 \text{ MPa}\}$$

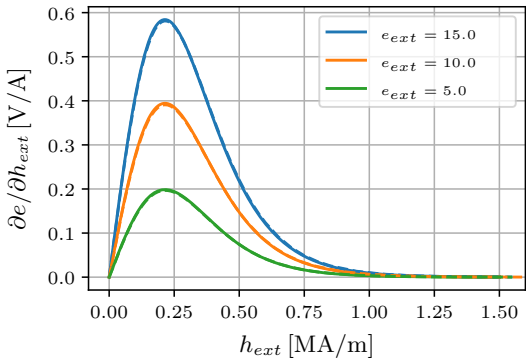

Supplement: Supplementary file 4 [file 12461318]

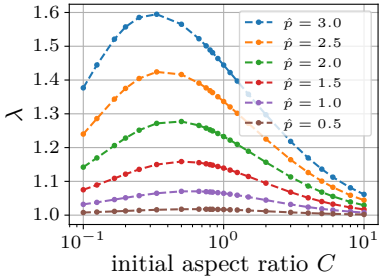

Supplement: Supplementary file 5 [file 12461318]

$$\epsilon_0 e'_s = -N' p(e')$$

$$h'_s = -N' m(h')$$

$N', \chi'$

$$h_{ext} + \Delta h_{ext}$$

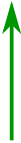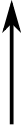

$$e_{ext}$$

Supplement: Supplementary file 6 [file 12461318]

$$C = 1, \chi_e = 10 \text{ and } \chi_m = 1$$

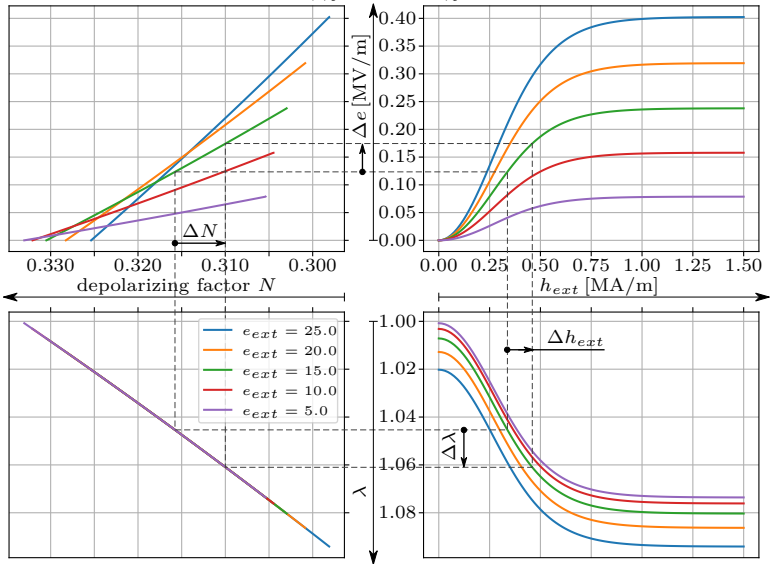

Supplement: Supplementary file 7 [file 12461318]

$$e_{ext} = 5.0 \text{ MV/m}$$

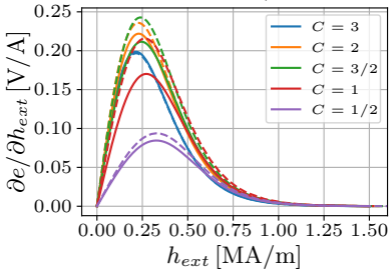

Supplement: Supplementary file 8 [file 12461318]

$$\{C, \chi_e, \chi_m, \mu\} = \{5, 20, 1, 0.1 \text{ MPa}\}$$

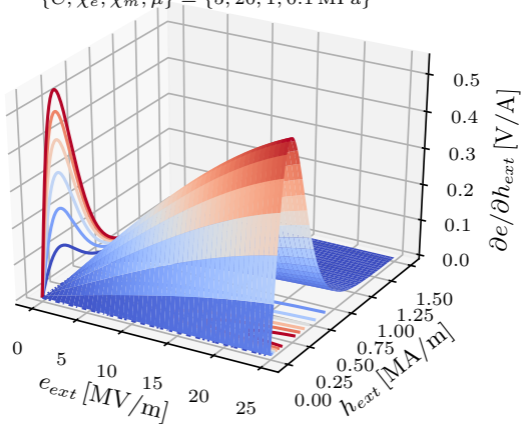

Supplement: Supplementary file 9 [file 12461318]

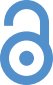

Supplement: Supplementary file 10 [file 12461318]

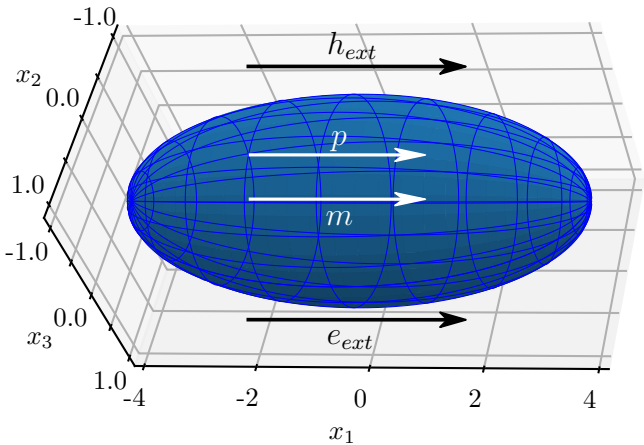

Supplement: Supplementary file 11 [file 12461318]

$$e_{ext} = 25 \text{ MV/m}$$

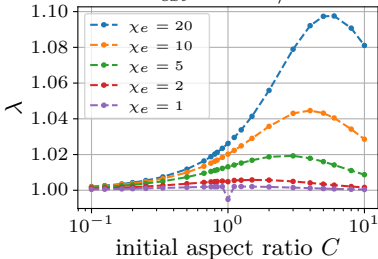

Supplement: Supplementary file 12 [file 12461318]

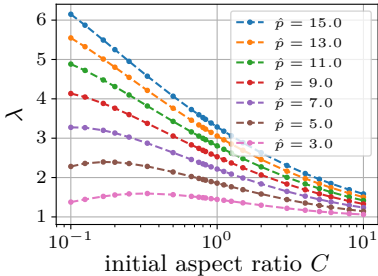

Supplement: Supplementary file 14 [file 12461318]

$$\chi_m = 5.0$$

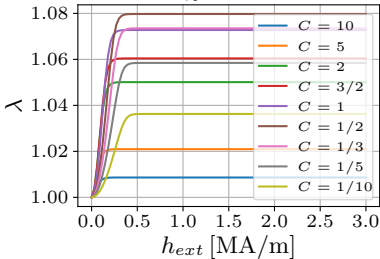

Supplement: Supplementary file 15 [file 12461318]

$$\{C, \chi_e, \chi_m, \mu\} = \{1, 10, 0.5, 0.1 \text{ MPa}\}$$

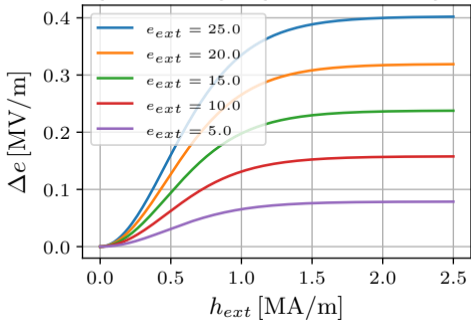

Supplement: Supplementary file 16 [file 12461318]

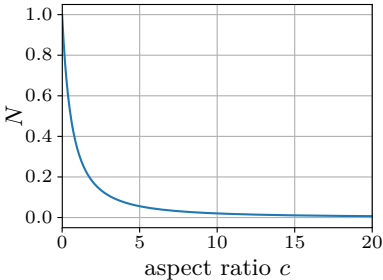

Supplement: Supplementary file 17 [file 12461318]

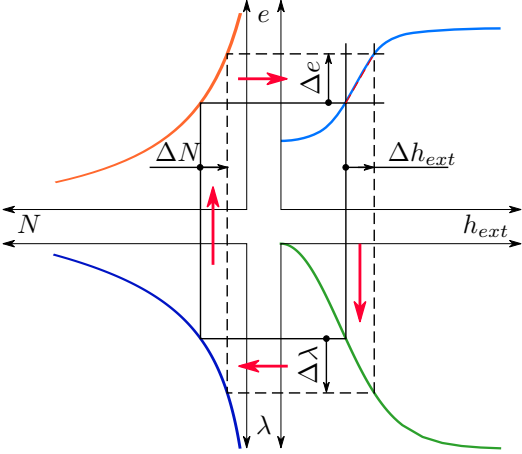

Supplement: Supplementary file 18 [file 12461318]

$$\{C, \chi_e, \chi_m, \mu\} = \{1, 20, 1, 0.1 \text{ MPa}\}$$

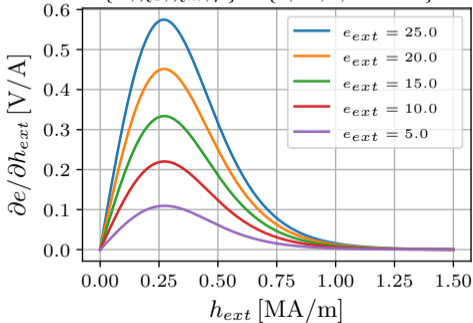

Supplement: Supplementary file 19 [file 12461318]

$$\{e_{ext}, \chi_e, \chi_m, \mu\} = \{20 \text{ MV/m}, 10, 1, 0.1 \text{ MPa}\}$$

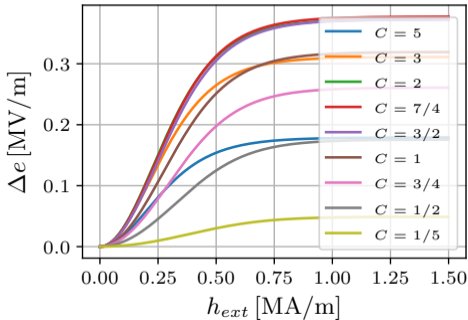

Supplement: Supplementary file 20 [file 12461318]

$$\{e_{ext}, \chi_e, \chi_m, \mu\} = \{5.0 \text{ MV/m}, 20, 1, 0.1 \text{ MPa}\}$$

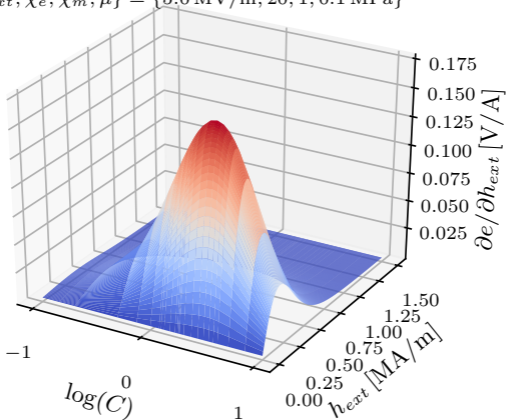

Supplement: Supplementary file 21 [file 12461318]

$$e_{ext} = 10 \text{ MV/m}$$

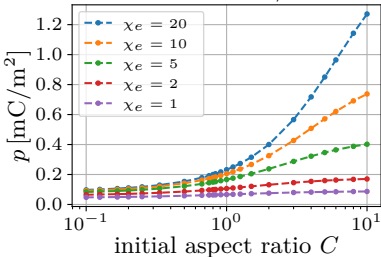

Supplement: Supplementary file 22 [file 12461318]

$$e_{ext} = 5 \text{ MV/m}$$

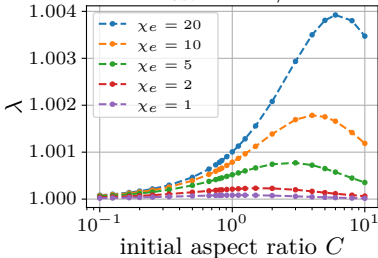

Supplement: Supplementary file 23 [file 12461318]

$$\chi_m = 1.0$$

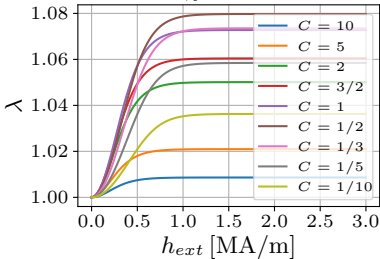

Supplement: Supplementary file 24 [file 12461318]

$$\{C, \chi_e, \chi_m, \mu\} = \{1, 10, 1, 0.05 \text{ MPa}\}$$

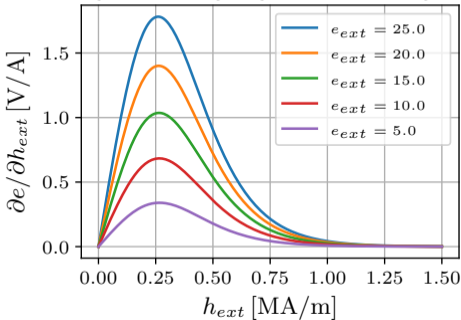

Supplement: Supplementary file 25 [file 12461318]

$$\chi_m = 0.5$$

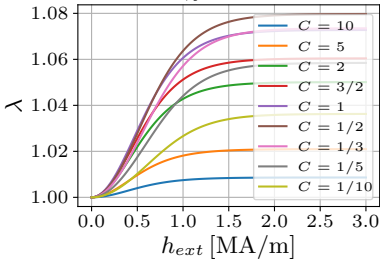

Supplement: Supplementary file 27 [file 12461318]

$$h_{ext} = 1.50 \text{ MA/m}$$

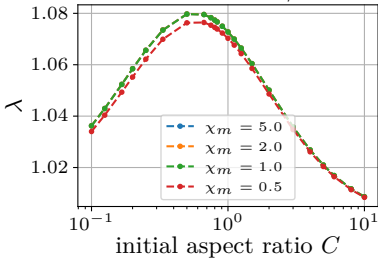

Supplement: Supplementary file 28 [file 12461318]

$$\chi_e = 20$$

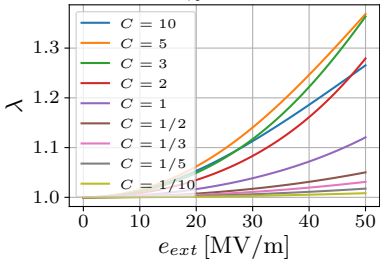

Supplement: Supplementary file 29 [file 12461318]

$$h_{ext} = 0.05 \text{ MA/m}$$

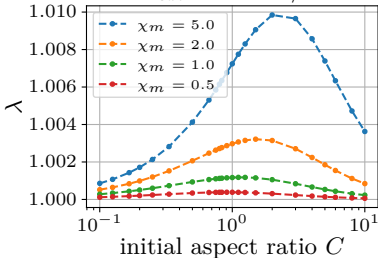

Supplement: Supplementary file 30 [file 12461318]

$$\{C, \chi_e, \chi_m, \mu\} = \{1, 10, 1, 0.1 \text{ MPa}\}$$

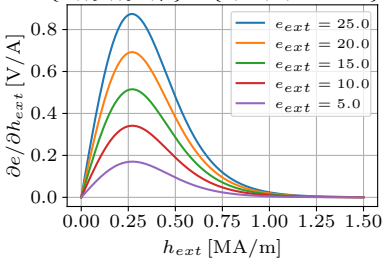

Supplement: Supplementary file 31 [file 12461318]

$$\{C, \chi_e, \chi_m, \mu\} = \{1, 10, 1, 0.1 \text{ MPa}\}$$

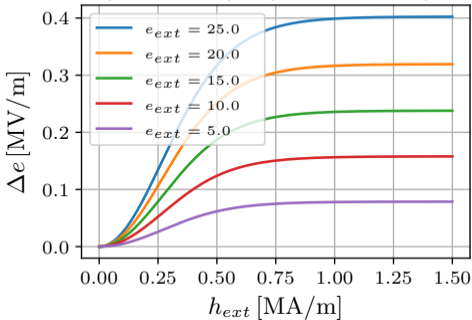

Supplement: Supplementary file 32 [file 12461318]

$$\{C, \chi_e, \chi_m, \mu\} = \{2, 10, 1, 0.1 \text{ MPa}\}$$

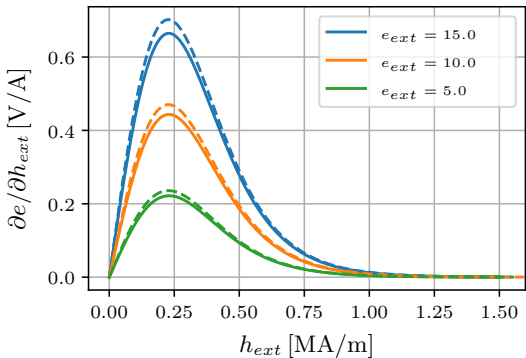

Supplement: Supplementary file 33 [file 12461318]

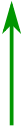

$h_{ext}$

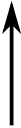

$e_{ext}$

$$\epsilon_0 e_s = -N' p(e)$$

$$h_s = -Nm(h)$$

$N, \lambda$

Supplement: Supplementary file 34 [file 12461318]

$$\{e_{ext}, \chi_e, \chi_m, \mu\} = \{5.0 \text{ MV/m}, 10, 1, 0.1 \text{ MPa}\}$$

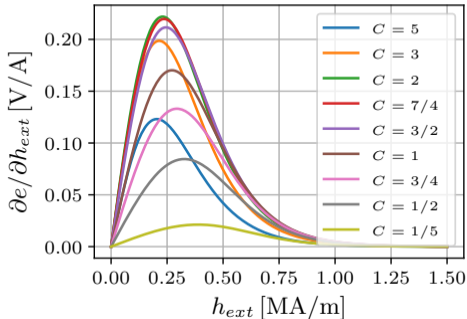

Supplement: Supplementary file 35 [file 12461318]

$$\{C, \chi_e, \chi_m, \mu\} = \{1, 10, 0.5, 0.1 \text{ MPa}\}$$

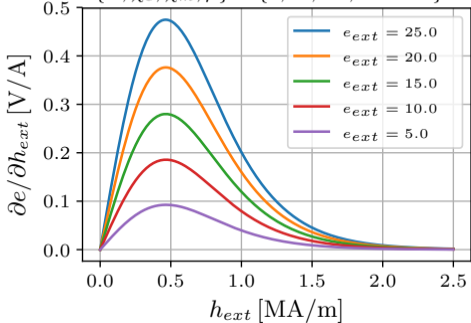

Supplement: Supplementary file 37 [file 12461318]

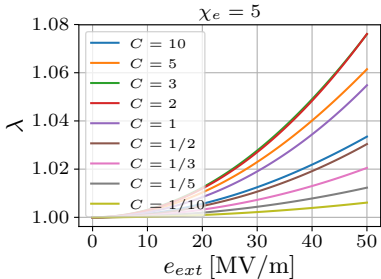

Supplement: Supplementary file 38 [file 12461318]

$$e_{ext} = 25 \text{ MV/m}$$

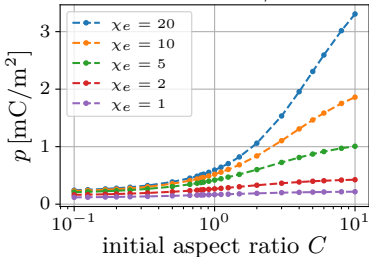

Supplement: Supplementary file 39 [file 12461318]

$$\{C, \chi_e, \chi_m, \mu\} = \{1, 20, 1, 0.1 \text{ MPa}\}$$

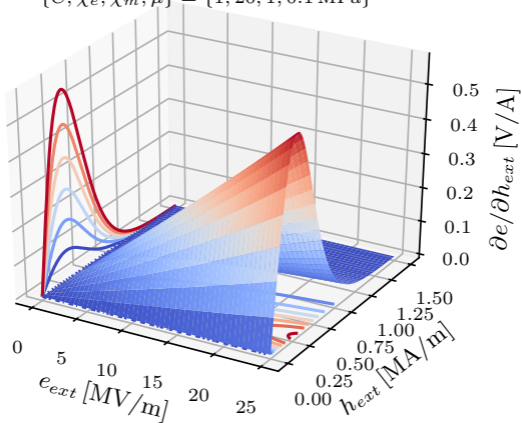

Supplement: Supplementary file 40 [file 12461318]

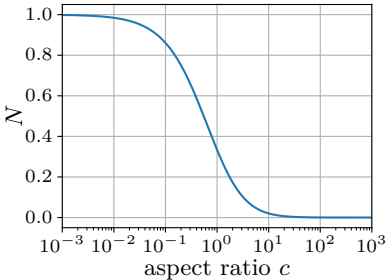

Supplement: Supplementary file 41 [file 12461318]

$$e_{ext} = 10 \text{ MV/m}$$

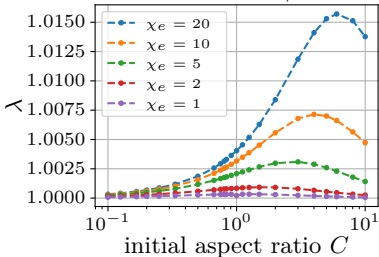

Supplement: Supplementary file 42 [file 12461318]

$$\{C, \chi_e, \chi_m, \mu\} = \{1, 10, 1, 0.1 \text{ MPa}\}$$

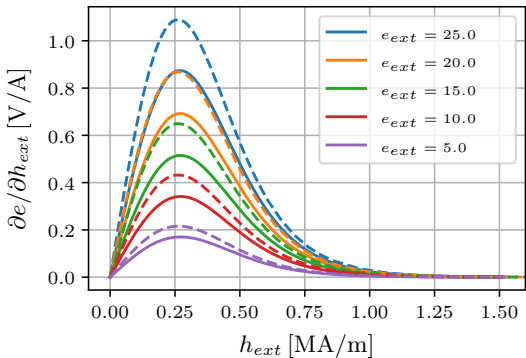

Supplement: Supplementary file 43 [file 12461318]

$$\{C, \chi_e, \chi_m, \mu\} = \{1, 10, 1, 0.05 \text{ MPa}\}$$

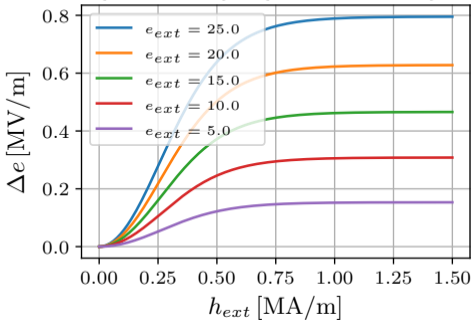

Supplement: Supplementary file 44 [file 12461318]

$$\{C, \chi_e, \chi_m, \mu\} = \{1, 10, 1, 0.1 \text{ MPa}\}$$

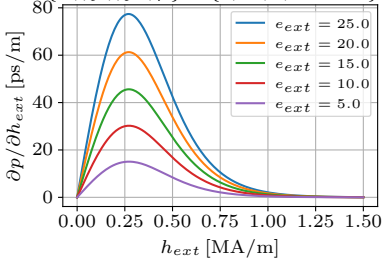

Supplement: Supplementary file 45 [file 12461318]

$$\chi_e = 10$$

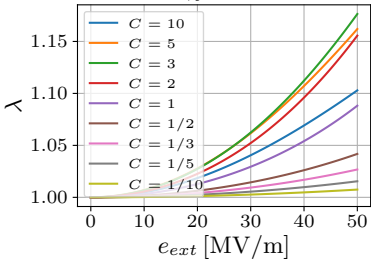

Supplement: Supplementary file 46 [file 12461318]

$$\{e_{ext}, \chi_e, \chi_m, \mu\} = \{25.0 \text{ MV/m}, 20, 1, 0.1 \text{ MPa}\}$$

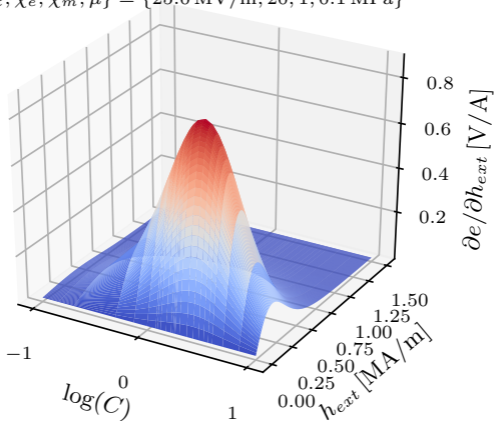

Supplement: Supplementary file 47 [file 12461318]

$$\{e_{ext}, \chi_e, \chi_m, \mu\} = \{5 \text{ MV/m}, 10, 1, 0.1 \text{ MPa}\}$$

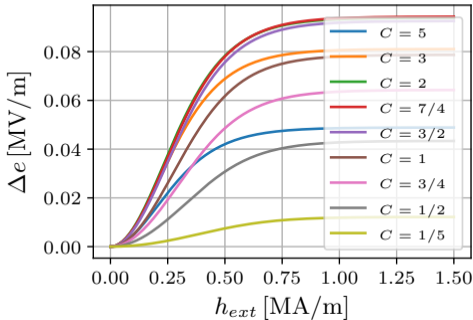

Supplement: Supplementary file 48 [file 12461318]

$$\{e_{ext}, \chi_e, \chi_m, \mu\} = \{20.0 \text{ MV/m}, 10, 1, 0.1 \text{ MPa}\}$$

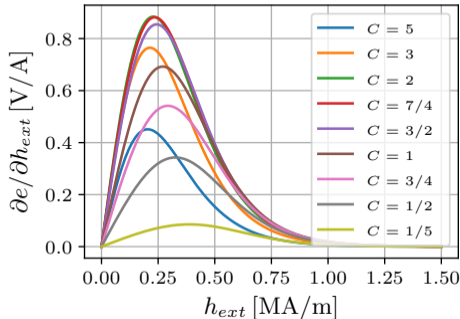

Supplement: Supplementary file 49 [file 12461318]

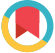

Check for  
updates

Supplement: Supplementary file 51 [file 12461318]

$$e_{ext} = 5 \text{ MV/m}$$

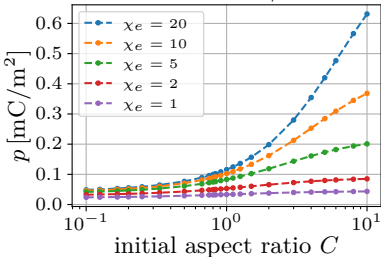

Supplement: Supplementary file 52 [file 12461318]

$$\{C, \chi_e, \chi_m, \mu\} = \{1, 10, 1, 0.1 \text{ MPa}\}$$

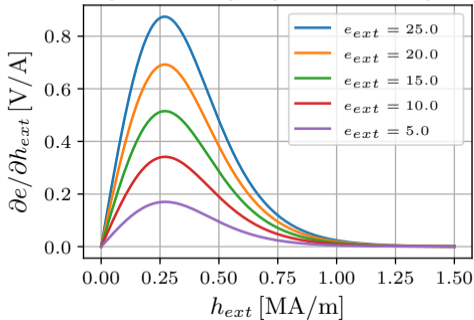

Supplement: Supplementary file 53 [file 12461318]

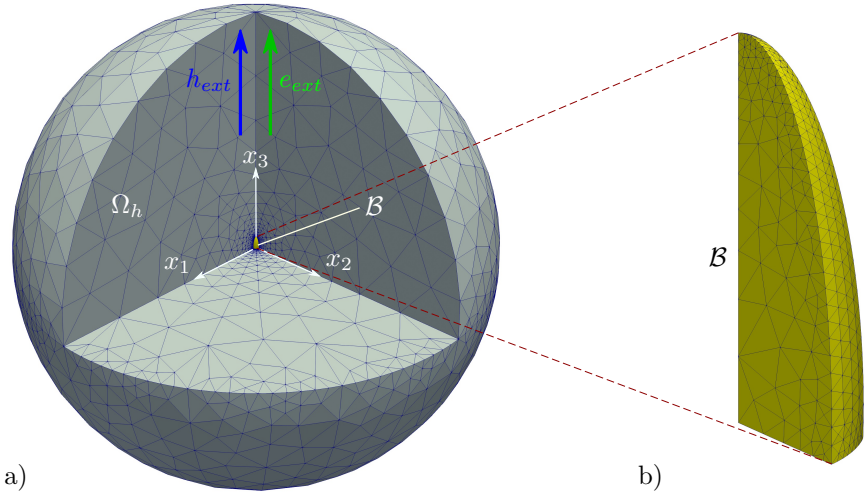

Supplement: Supplementary file 55 [file 12461318]
